# Supplementary material for: Aberrant Expression of miR-362 Promotes Lung Cancer Metastasis through Downregulation of Sema3A
Source: Hindawi journal article supplement (doi:10.1155/2018/1687097), 2018-08-01
Supplement: f1 [file 1687097.f1.zip]

Supplementary Fig. 1 **miR-362 affects other functions in NSCLC.** AE. Cell colony formation ability decreased when miR-362 was absent in A549. CG. Cell colony formation ability decreased when miR-362 was absent in 95-D. BF. Colony formation assays were employed in A549 cell line transfected by miR-362. DH. Colony formation assays were employed in 95-D cell line transfected by miR-362. miR-362 concentration was 50 nm. IJ. The cell apoptosis rate changes when miR-362 was absent in A549 and 95-D. KL. The cell cycle changed when miR-362 was absent in A549 and 95-D. Data are from three independent experiments.

Supplementary Fig. 2 **Prediction of miR-362 target genes.** A. The prediction of miR-362 targets by miRanda, TargetScan, miRwalk and miRDB software. B. Reporter vector constructs containing the Sema3A portion of the 3'UTR with the miR-362 binding site and mutated binding site.

Supplementary Figure 1

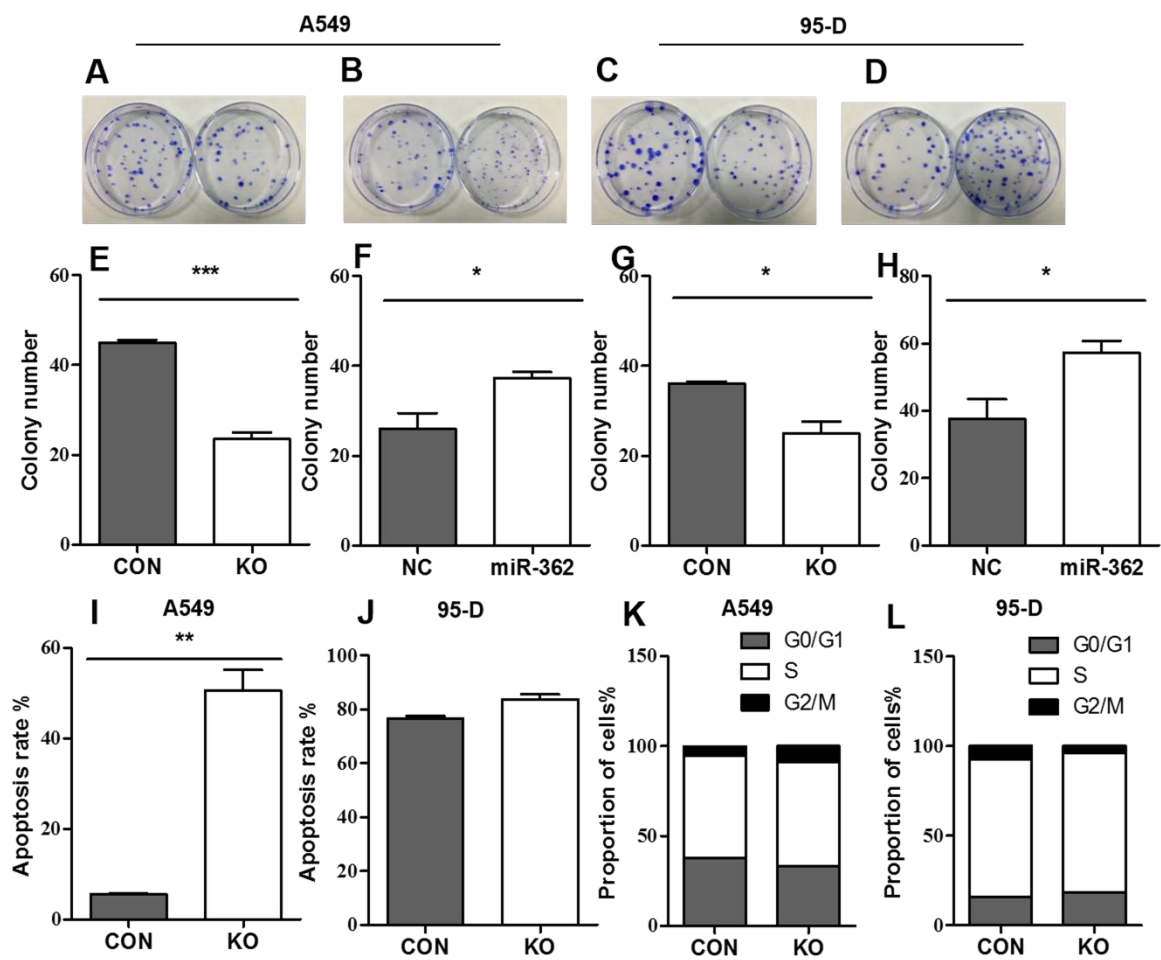

Supplementary Figure 2

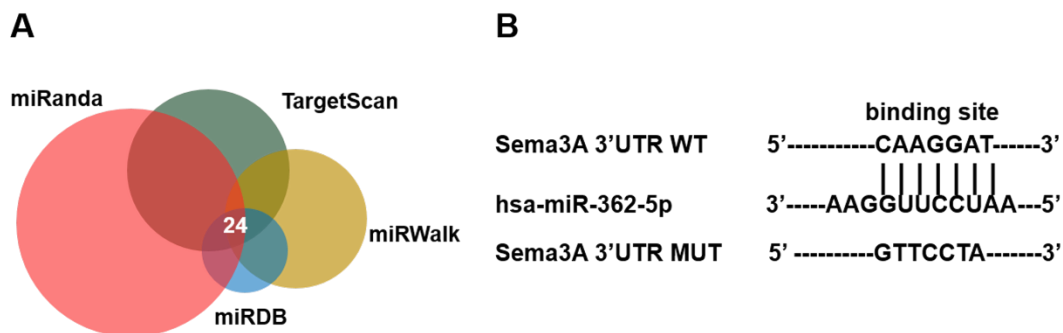

Supplemental Table1 qRT-PCR primers of genes

| Primer name | Primer sequence(5'-3')             |
|-------------|------------------------------------|
| ATP2B4-F1   | CTCGAGCTTTTCATTGTCACGTCAGCT        |
| ATP2B4-R1   | GTCGACATGACAAGTGACTACCAAGGAG       |
| ATP2B4-F2   | CTCGAGGGTCTATAAGGATACTCTGATT       |
| ATP2B4-R2   | GTCGACGAACCAGCCATTGTTTTATC         |
| ATP7A-F1    | CTCGAGGATATTTGAATATTTGAAGTTCTCT    |
| ATP7A-R1    | GTCGACCTACTCTAGCTGTGTTTTAATCTTT    |
| ATP7A-F2    | CTCGAGCTCAACCTTACGTTTTTAGTTAAAG    |
| ATP7A-R2    | GTCGACACACTATAATTATAAAGTTGAAGGC    |
| CCDC91 -F   | CTCGAGTGGATAAATCATATTACACCTTCA     |
| CCDC91 -R   | GTCGACGCTGCTACTACTAATAATAAAAAT     |
| CHSY1 -F    | CTCGAGAGCTTTGCTGGAAAAGACGTT        |
| CHSY1 -R    | GTCGACCTACATAATGTTTCAGCAAGAAGA     |
| DDX58-F     | CTCGAGCAATCTGGTGAGCAGTGGT          |
| DDX58-R     | GTCGACGTAAGAATACTACTACTAGTAATTATC  |
| DLL1-F      | CTCGAGTGAGATGGCAAGACTCCCGTT        |
| DLL1-R      | GTCGACCGGAAGGCAGTGCCGCAG           |
| DPP8 -F     | CTCGAGATAGCTTATGCTTCATTGCTT        |
| DPP8 -R     | GTCGACTATCATCAAAGAAAAATGAGAAT      |
| FAM116A-F   | CTCGAGCATCTTATTATTTTTCAAAAAGGT     |
| FAM116A-R   | GTCGACAAATGAAGACACCATTATCATG       |
| FBXO3-F     | CTCGAGTACCTTTGTTTTAAAATATTTTATACTT |
| FBXO3-R     | GTCGACTATTAGGAATCACTAAATGGATTAG    |
| IL17RD-F    | CTCGAGAGTCTAAGCATTGCCACTTTA        |
| IL17RD-R    | GTCGACAGAGCTCCATATCATTTTAGAAA      |
| LHX4-F      | CTCGAGACCCTACCTGCCCCCCTGG          |
| LHX4-R      | GTCGACTGTGTTCTGAGATGAGTCTGCTCTC    |
| MIER3-F     | CTCGAGACCGATCCCGATCCCTGCT          |
| MIER3-R     | GTCGACGCACACAGTTCCTTGTGCTGG        |
| NOL4-F      | CTCGAGTACTTTAGTATGTCCAGCCTATTGC    |
| NOL4-R      | GTCGACTTTTTGCCAGGTAATTCAGCTT       |
| OLIG3-F     | CTCGAGGACGCAGTGTAGGTCAAAGAAT       |
| OLIG3-R     | GTCGACGAAGCGCGTGTGCGTGAGT          |
| OSBPL2-F    | CTCGAGCACTGTGAGCCTCGTCACAGCA       |
| OSBPL2-R    | GTCGACGGCGCCGTGAAGAATTTCCCT        |
| PIK3C2B-F1  | CTCGAGGACTTTGAATTTGATATGAATCTTT    |
| PIK3C2B-R1  | GTCGACTTAAACTTCCATGCTGCCCT         |
| PIK3C2B-F2  | CTCGAGTGCTGACTCATTCCATAACTGGA      |
| PIK3C2B-R2  | GTCGACTACAGGCACAAAGCCAGTAACACA     |
| PLAGL2-F    | CTCGAGGTCCTCTCTCCACCTGCCCTCTTAT    |
| PLAGL2-R    | GTCGACAGGTTTCAGAGTTCCAGGAGAGGC     |

continued

| Primer name  | Primer sequence(5'-3')               |
|--------------|--------------------------------------|
| PRKCA-F      | CTCGAGAACTGTCTTGATACTTTTCATTCTT      |
| PRKCA-R      | GTCGACGTGGGTGTTGGCGAACAACA           |
| PTPRE-F      | CTCGAGTATGTTATTACAGTTTCAACTATCATA    |
| PTPRE-R      | GTCGACAGGAATGAAATTAAGAGATTTAAAG      |
| RMI1-F       | CTCGAGTTTGCTGATTATAATATTTGGTATA      |
| RMI1-R       | GTCGACGACACCTAAAGACATAGATAAATGC      |
| SEMA3A-F     | CTCGAGAGCAAAGCCATTGTATTGAACTAAA      |
| SEMA3A-R     | GTCGACATGTTTTTTTTTTTTTTTAATATTTCCA   |
| SNX18-F      | CTCGAGGGACGTTGGATTATGGACTTTTTCA      |
| SNX18-R      | GTCGACTTACAATGTGTGGTACTGTTTCTATTATAT |
| SYS1-F       | CTCGAGCCTCTTTGAGGGTAATAACAGAATT      |
| SYS1-R       | GTCGACCACTGCAAAGGTAAGTGTGTGA         |
| YTHDF3-F     | CTCGAGTCGTCAAGCACTTTCTGTCCTGAA       |
| YTHDF3-R     | GTCGACAACTACAACAAAGAAAAAGTTGAAGC     |
| SEMA3A-Mut-R | TAGGAACAATCCAACCACGTTTTG             |
| SEMA3A-Mut-F | GTTCTAATATTTTGTCTACCGGCC             |
